# Supplementary material for: Protease-Activated Receptor 2 Activation Inhibits N-Type Ca2+ Currents in Rat Peripheral Sympathetic Neurons
Source: PubMed Central journal article supplement — Mol Cells. 2014 Nov 10;37(11):804–11. doi: 10.14348/molcells.2014.0167 (PMC4255100; doi:10.14348/molcells.2014.0167), 2014-11-10

## Supplementary figure legends

**Figure S1. Western Immunoblots demonstrating PAR-2 expression in coeliac ganglia neurons.** Immunoblots for PAR-2 (52 KD). Lung was used as positive control and liver used as a negative control. Tissue of origin is showed below each lane.

**Figure S2. Effect of thrombin on  $I_{Ca}$  in coeliac ganglia neurons.** (A) Left, a representative trace of thrombin (30 nM) effect on  $I_{Ca}$ . (B) time course of thrombin (30 nM) effect on  $I_{Ca}$ . (C) Summary of  $I_{Ca}$  inhibition by thrombin.

**Figure S3. Effect of BT and LR-NH<sub>2</sub> on repetitive action potentials (APs) in coeliac ganglia neurons.** (A) Representative traces of repetitive AP firing before (left panel) and during application of 30 nM BT (Right panel) in current-clamp mode. Action potentials were elicited by positive current (100–200 pA) injection for 300 ms via the patch pipette. (B) Representative traces of repetitive AP firing before (left panel) and during presence of 100  $\mu$ M LR-NH<sub>2</sub> (right panel) in current-clamp mode.

**Figure S4. Effect of thrombin on repetitive firing of a firing of action potentials (APs) in CG neurons.** (A) representative traces of thrombin (30 nM) effect on repetitive APs evoked by current injection in current-clamp mode. Action potentials were elicited by positive current (100–200 pA) injection for 300 ms via the patch pipette.

**Figure S5. Contribution of N-type ( $\omega$ -CgTx-sensitive) and L-type (nifedipine-sensitive) currents to the total  $I_{Ca}$ .** (A) a representative trace of the effects induced by application of nifedipine (1  $\mu$ M) (left) and  $\omega$ -CgTx (1  $\mu$ M) (right) on  $I_{Ca}$ . (B) Time course of the effects induced by application of nifedipine (1  $\mu$ M) and  $\omega$ -CgTx (1  $\mu$ M) on  $I_{Ca}$ . Trace 1, 2 and 3, 4 in (A) panel represent the traces recorded at the corresponding time indicated in right panel respectively. (C) Summary of  $I_{Ca}$  inhibition by nifedipine and  $\omega$ -CgTx.

**Figure S6. Effect of nifedipine and  $\omega$ -CgTx on  $I_{Ca}$  and PAR-2 agonist-induced  $I_{Ca}$  inhibition.** (A) *Left*, a representative trace of the effects induced by consecutive application of nifedipine (1  $\mu$ M) and trypsin (30 nM) on  $I_{Ca}$ . *Right*, time course of effects induced by consecutive application of nifedipine (1  $\mu$ M) and trypsin (30 nM) on  $I_{Ca}$ . Trace 1, 2 and 3 in left panel represent the traces recorded at the corresponding time indicated in right panel respectively. (B) *Left*, a representative trace of the effects induced by consecutive application of nifedipine (1  $\mu$ M),  $\omega$ -CgTx (1  $\mu$ M) and trypsin (30 nM) on  $I_{Ca}$ . *Right*, time course of effects induced by consecutive application of nifedipine (1  $\mu$ M),  $\omega$ -CgTx (1  $\mu$ M) and trypsin (30 nM) on  $I_{Ca}$ . Trace 1, 2 and 3, 4 in left panel represent the traces recorded at the corresponding time indicated in right panel respectively. (C) Summary of  $I_{Ca}$  inhibition by trypsin in the absence and presence of nifedipine and  $\omega$ -CgTx. (D) *Left*, a representative trace of the effects induced by consecutive application of nifedipine (1  $\mu$ M) and SL-NH<sub>2</sub> (100  $\mu$ M) on  $I_{Ca}$ . *Right*, time course of effects induced by consecutive application of nifedipine (1  $\mu$ M) and SL-NH<sub>2</sub> (100  $\mu$ M) on  $I_{Ca}$ . Trace 1, 2 and 3 in left panel represent the traces recorded at the corresponding time indicated in right panel respectively. (E) *Left*, a representative trace of the effects induced by consecutive application of nifedipine (1  $\mu$ M),  $\omega$ -CgTx (1  $\mu$ M) and SL-NH<sub>2</sub> (100  $\mu$ M) on  $I_{Ca}$ . *Right*, time course of effects induced by consecutive application of nifedipine (1

$\mu\text{M}$ ),  $\omega\text{-CgTx}$  ( $1 \mu\text{M}$ ) and  $\text{SL-NH}_2$  ( $100 \mu\text{M}$ ) on  $\text{I}_{\text{Ca}}$ . Trace 1, 2 and 3, 4 in left panel represent the traces recorded at the corresponding time indicated in right panel respectively. (F) Summary of  $\text{I}_{\text{Ca}}$  inhibition by  $\text{SL-NH}_2$  in the absence and presence of nifedipine and  $\omega\text{-CgTx}$ .

(KD)

75

50

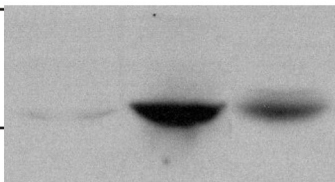

actin

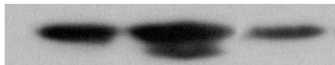

Liver

Lung

CG

**sup1**

A

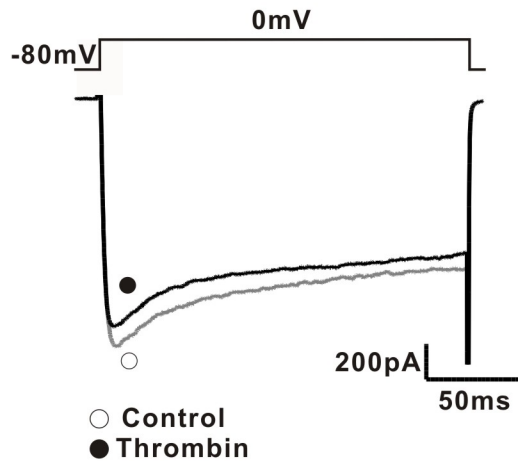

B

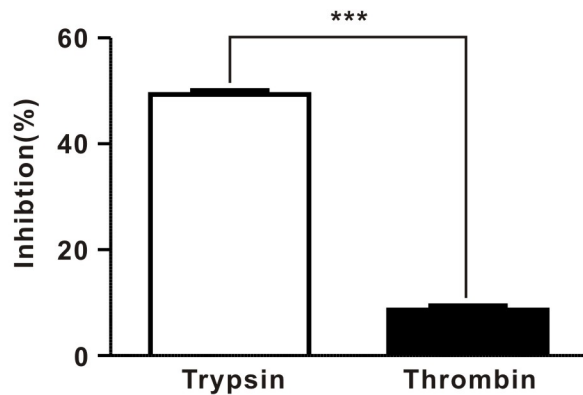

sup2

**A**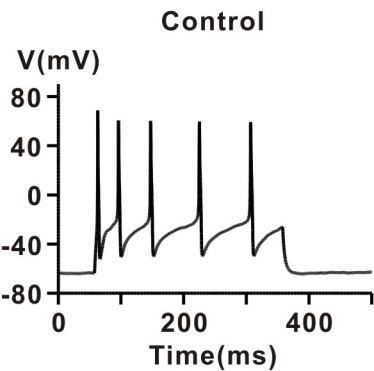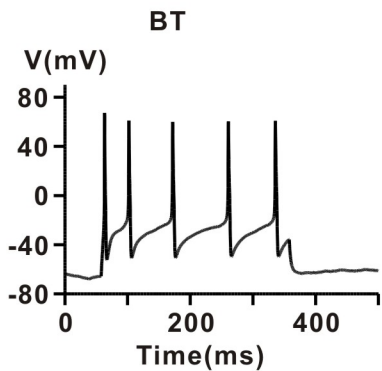**B**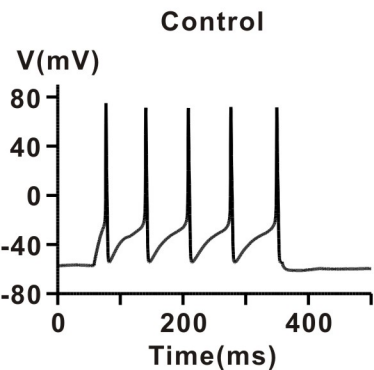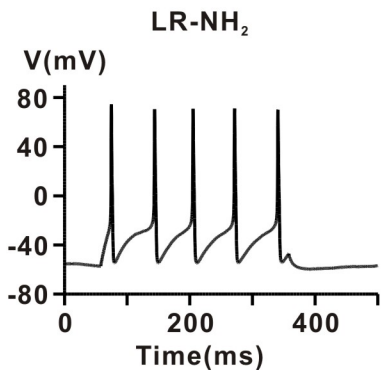**sup3**

A

Control

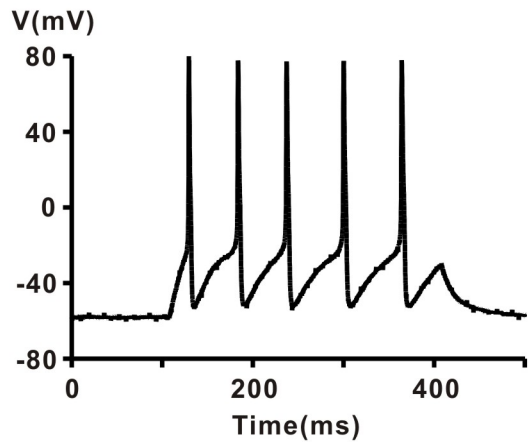

B

Thrombin

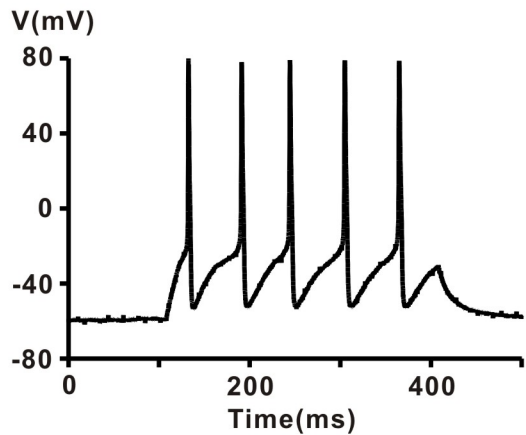

sup4

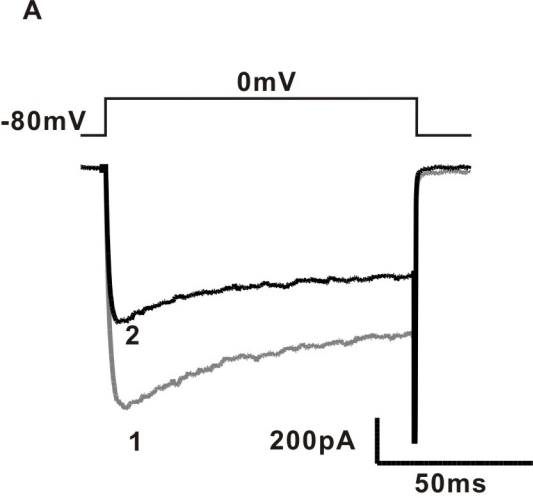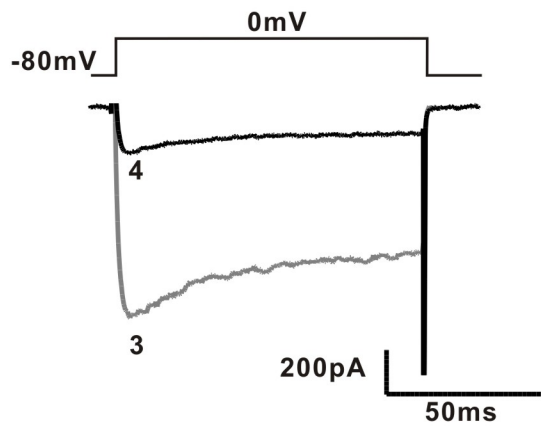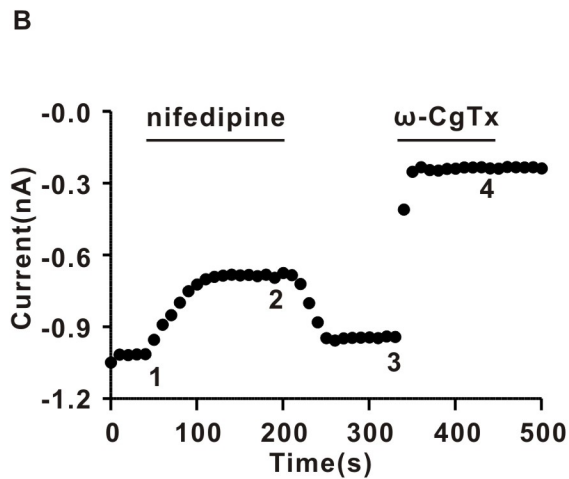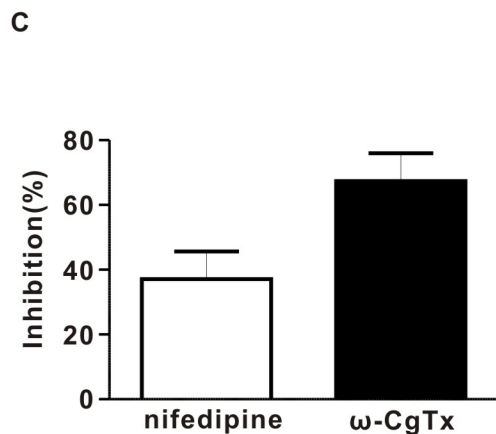

**sup.5**

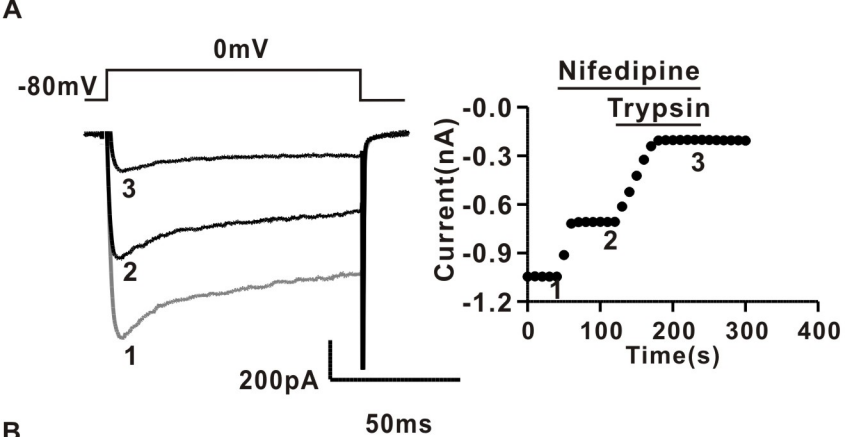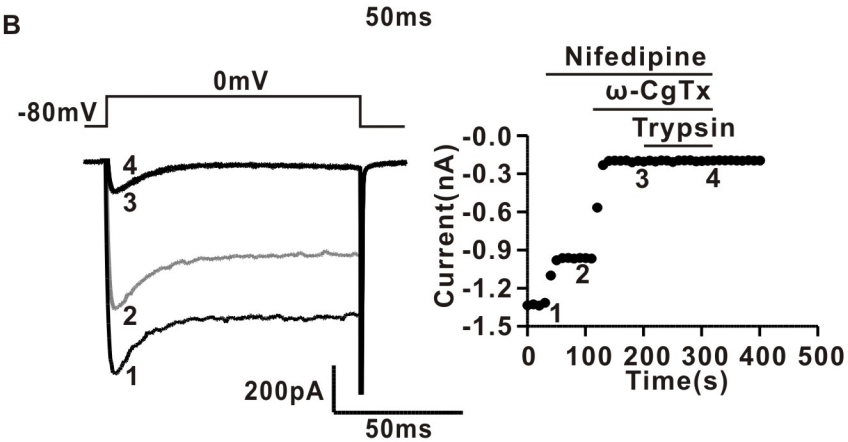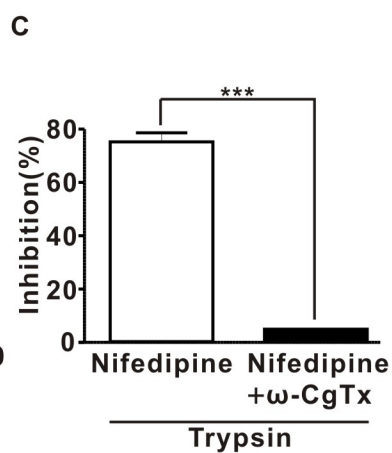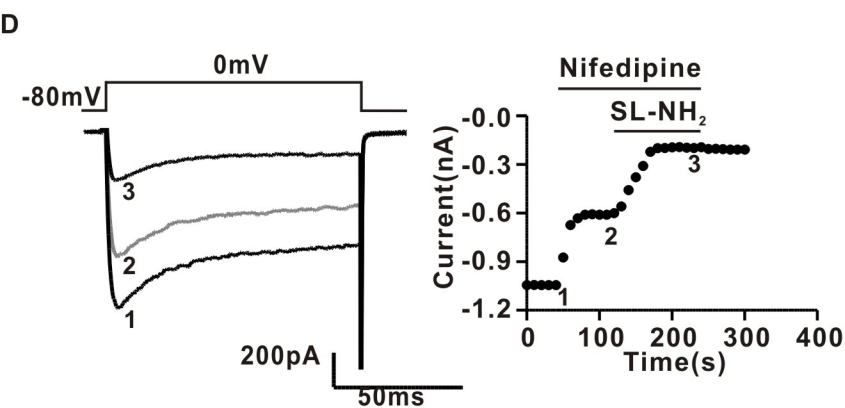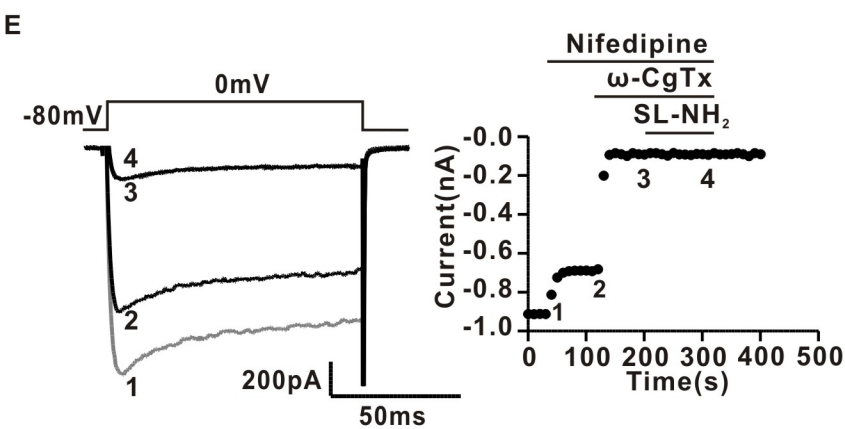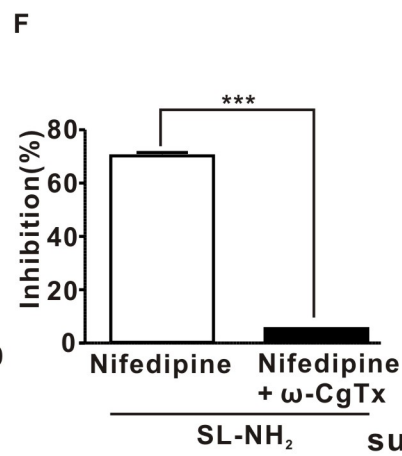



(KD)

75

50

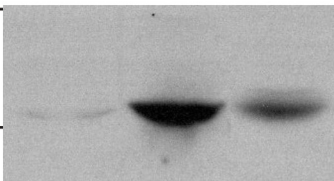

actin

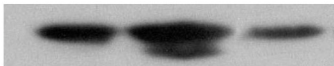

Liver

Lung

CG

**Supplementary Fig. S1**

**A**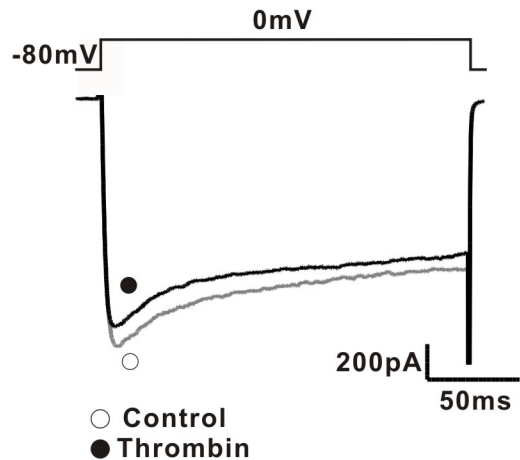**B**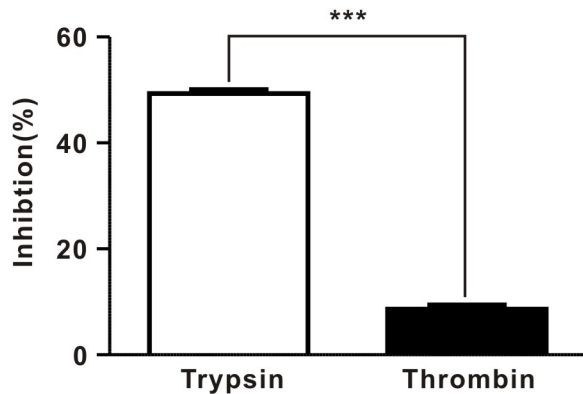**Supplementary Fig. S2**

**A**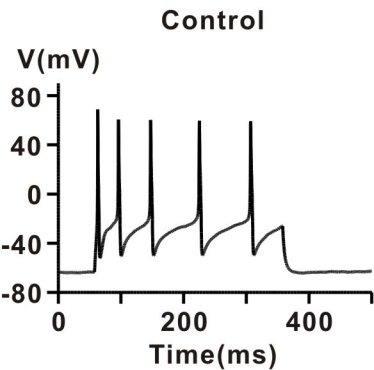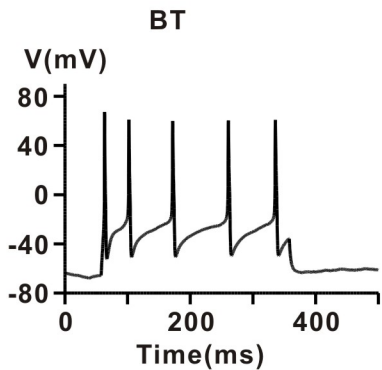**B**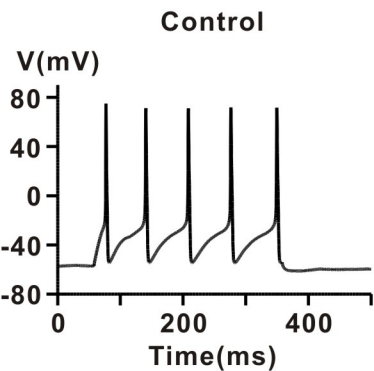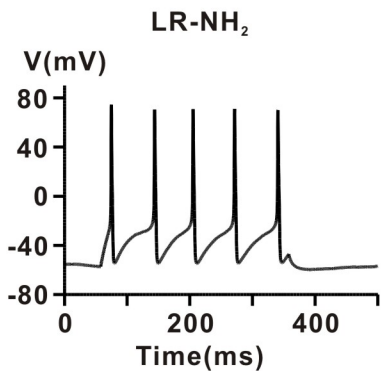

A

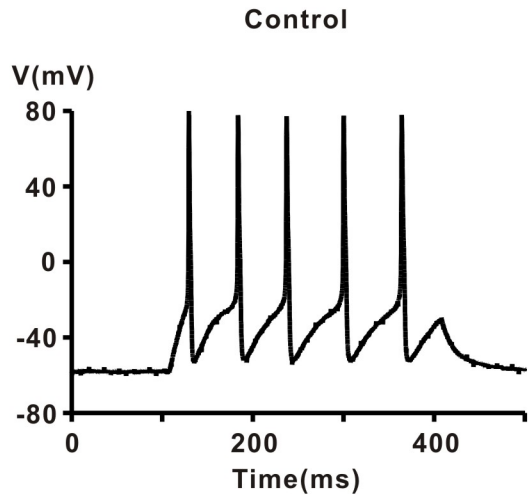

B

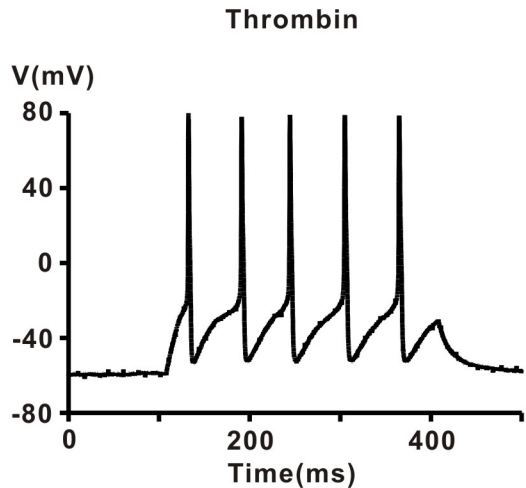

Supplementary Fig. S4

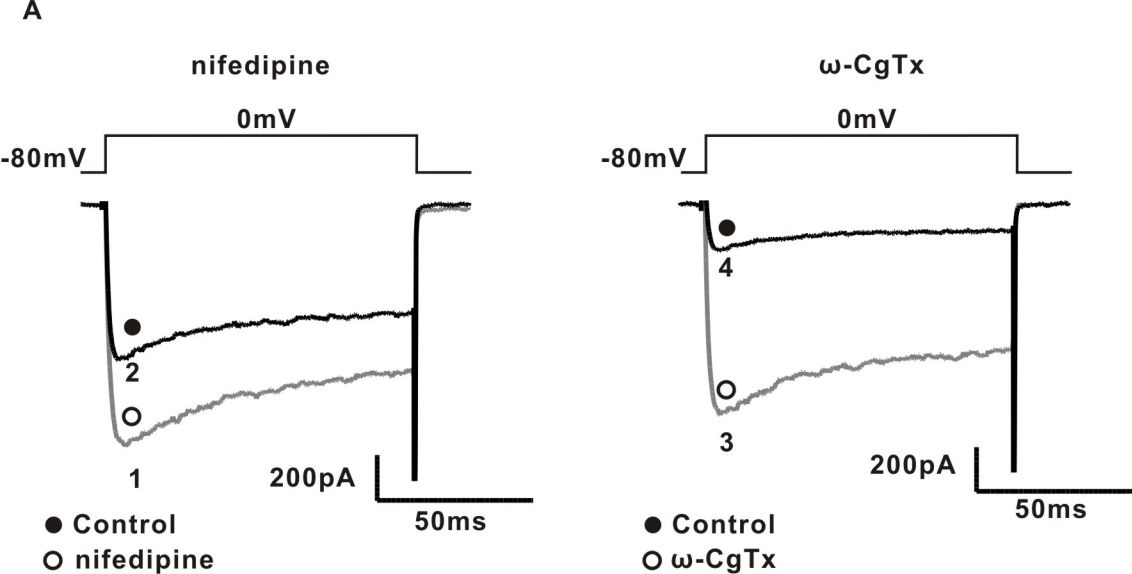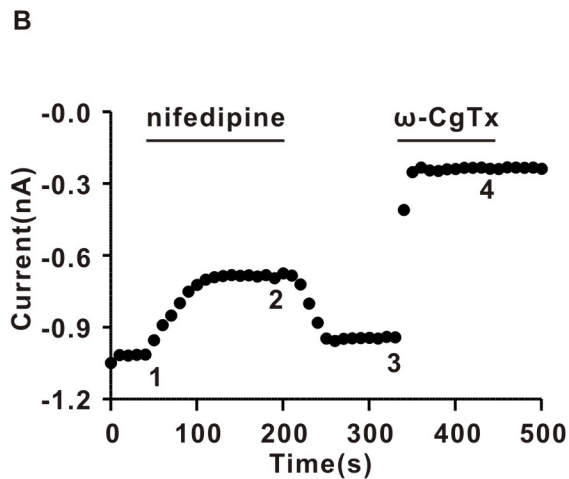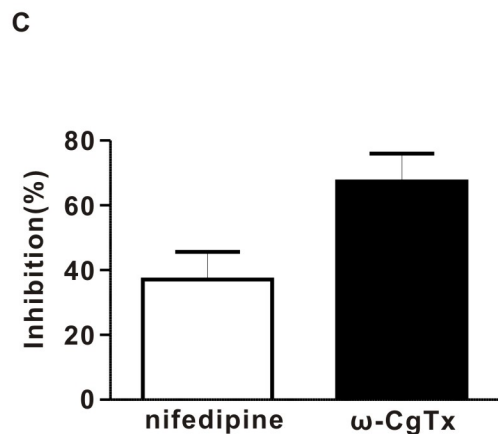

Supplementary Fig. S5

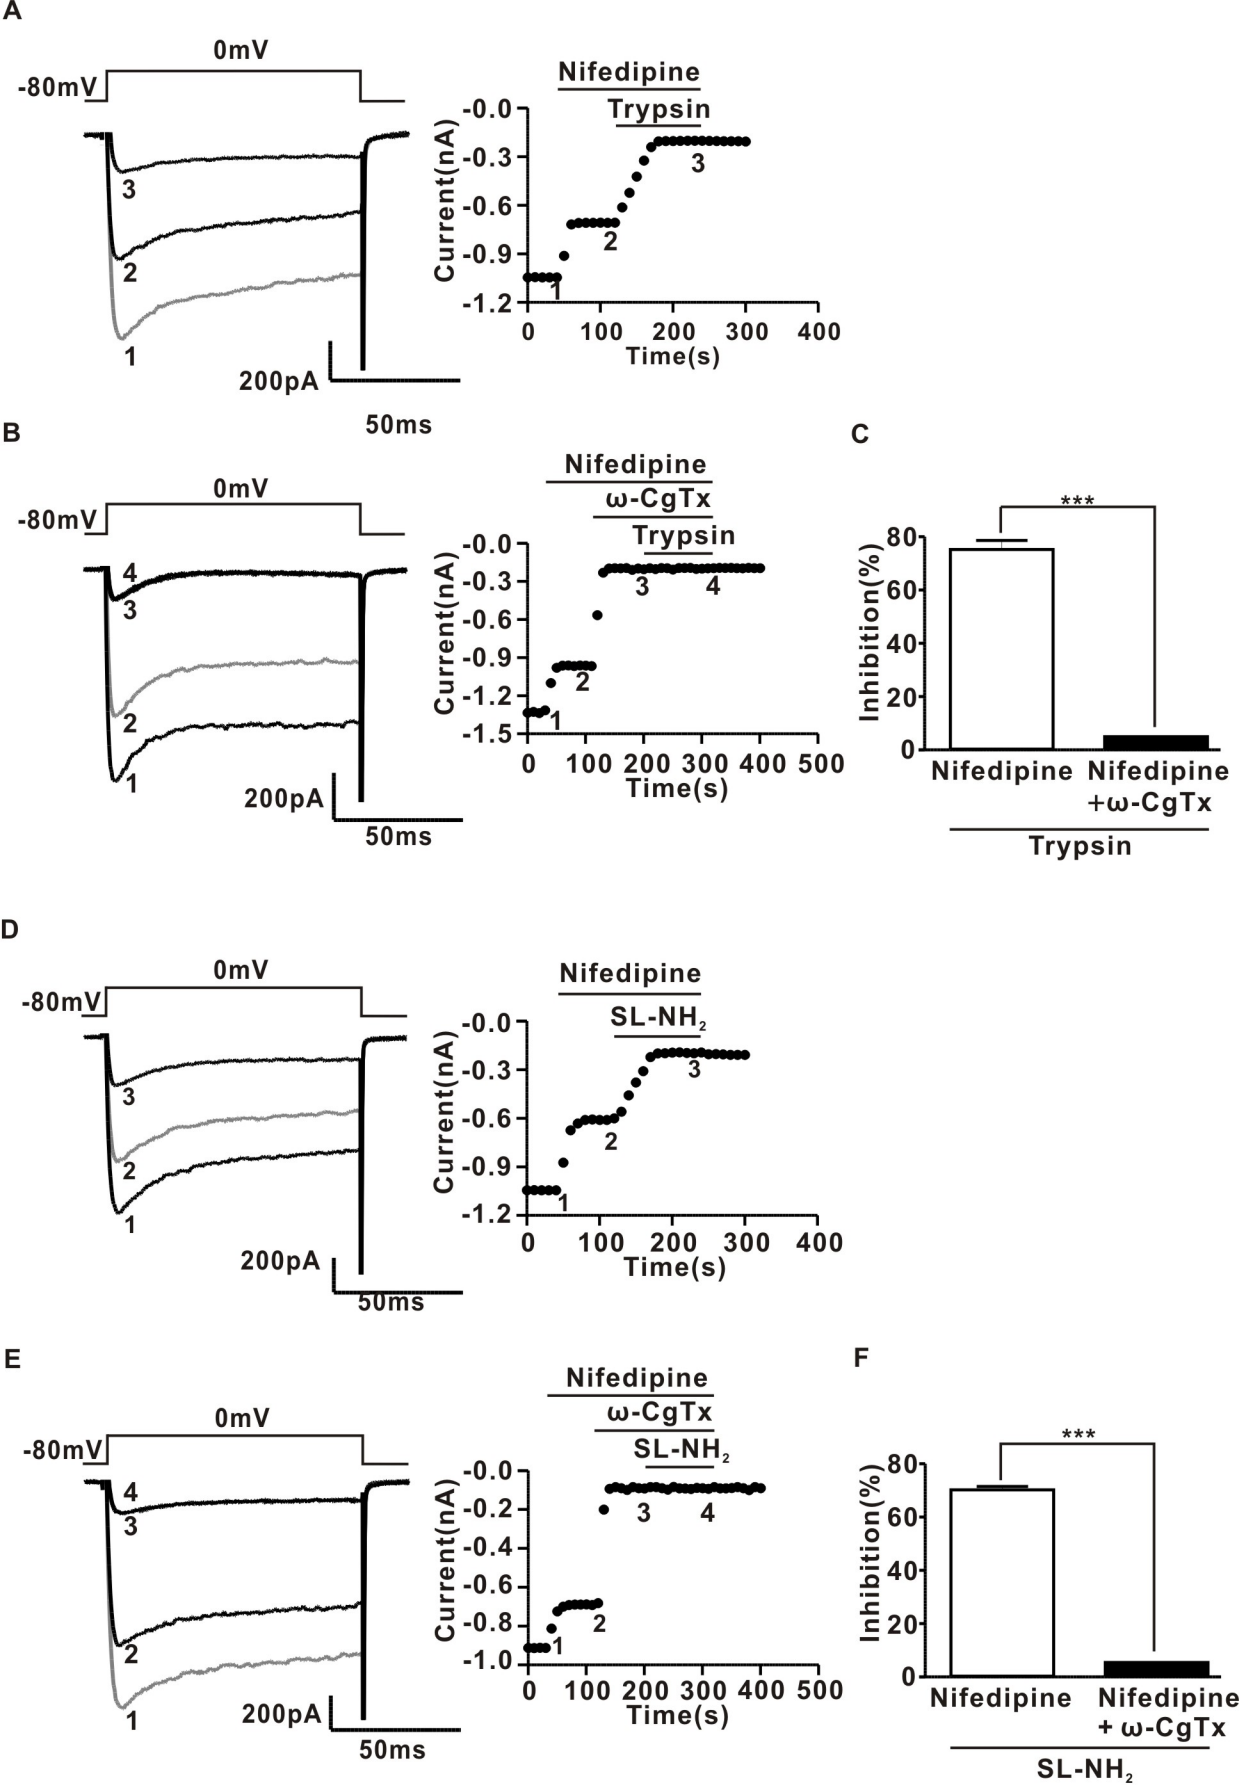

Supplement: molcell-37-11-804-supplementaty.pdf [file molcell-37-11-804-supplementaty.pdf]
